# Supplementary material for: Asymmetric Effect of Business Cycles on Population Health: Evidence From the ASEAN Countries
Source: Front Public Health. 2020 Feb 21;8:32. doi: 10.3389/fpubh.2020.00032 (PMC7047288; doi:10.3389/fpubh.2020.00032)
Supplement: Supplementary file 1 [file Data_Sheet_1.docx]

**Appendix**

In order to model the cointegrated relationship between population health (measured by life expectancy at birth) and economic development (measured by real GDP per capita) with a deterministic trend, we define these two variables based on Hatemi-J (2014), Hatemi-J and El-Khatib (2016), and Hatemi-J (2014) as follows:

[A1]

where and represent life expectancy at birth and GDP per capita, respectively. Subscript *i*=1,2,3,…,*N* denotes the individual country, and *N* represents the total number of countries included in our study. and are the drifts, and *t*=1,2,3,…,*T* is the deterministic trend component. and are coefficients corresponding to the deterministic trend components for and . (for *h*=1,2) is white noise residual, and (for *h*=1,2) is the cumulative sum of the residuals. In order to model the asymmetric cointegrated relationship between and , the positive and negative shocks for these two panel variables are defined as follows:

[A2]

It follows that the positive and negative components could be defined as follows:

[A3]

where =+ and =+. and (for *h*=1,2) are positive and negative cumulative sum of shocks, respectively.
